# Supplementary material
Source: publisher figshare collection journal article supplement (https://springernature.figshare.com/ndownloader/files/22332135)
Supplement: Supplementary file 1 [file 22332135]

## Sheet: 東道
		Additional file 1 Raw data of chemical composition analysis of laterite blocks used for the bridge construction along the East Royal Road by a portable XRF
				Cr	Co	Cu	Y	Zr	Ti	Sr	Fe	V	As	Zn
				ppm	ppm	ppm	ppm	ppm	ppm	ppm	ppm	ppm	ppm	ppm
		Bridge	2494	245	60	374	7.5	195	6852	47	292034	1268	257	186
				172	70	337	8.3	222	6315	30.3	362998	1053	254	218
				150	192	48	23.7	79	5345	198	476911	639	142	107
				236	121	207	10.5	199	6771	31.4	311357	574	359	51
				151	82	14	18	124	6963	67	354778	574	161	40
				326	154	27	4.9	64	11170	22.1	584111	1912	29	23
				1089	202	102	11.4	97	9906	44	545768	1433	45	48
				361	79	119	7.1	42	13790	57	757241	3617	47	15
				302	160	301	8	194	6884	35.7	396662	933	515	71
				259	127	333	8.5	217	8369	36.4	422622	1397	496	97
			mean	329.1	124.7	186.2	10.79	143.3	8236.5	56.89	450448	1340	230.5	85.6
			median	252	124	163	8.4	159	6923.5	40.2	409642	1160.5	207.5	61
			s.d.*	276.554	51.3356	140.978	5.7491	69.2597	2620.86	51.3314	144023	909.33	179.674	68.3166
		Bridge	3708	259	96	-	16.3	102	10848	41	579099	1610	95	53
				463	211	-	14.4	132	8437	29.5	630711	1014	167	38
				153	118	-	20	64	3799	67	375929	499	62	45
				531	205	-	9.6	129	7697	41	610788	1241	157	13
				388	-	-	15.8	159	8543	46	695376	2156	161	108
				318	-	270	13.5	70	11512	60	424507	4085	20	98
				212	142	-	7.7	118	6449	34	574038	677	109	39
				-	127	9	8.9	145	3274	34.2	338494	305	40	5
				408	-	-	24.8	249	9589	46	461032	1884	101	152
				258	-	-	12.2	209	8955	35	436651	1628	97	77
			mean	332.222	149.833	139.5	14.32	137.7	7910.3	43.37	512662	1509.9	100.9	62.8
			median	318	134.5	139.5	13.95	130.5	8490	41	517535	1425.5	99	49
			s.d.*	124.054	47.4949	184.555	5.25839	57.5076	2723.73	11.9922	120358	1090.27	50.5645	45.7719
		Bridge	3706	258	167	57	23.5	206	13367	123	431303	1346	22	41
				153	194	106	30	148	8578	121	585133	1418	66	114
				91	217	59	24	147	8081	63	625729	1332	54	69
				70	132	76	30.1	220	9143	74	320470	938	39	63
				82	139	68	18.4	191	10419	118	284430	921	40	59
				369	-	42	20.7	203	15022	240	388509	3492	40	137
				297	145	92	30	264	10019	83	322723	1091	47	80
				299	-	46	21.1	175	11974	72	411948	2266	56	123
				370	-	-	27.8	180	10044	94	228410	2047	36	203
				256	207	106	23.1	167	11950	77	592608	1745	79	98
			mean	224.5	171.571	72.4444	24.87	190.1	10859.7	106.5	419126	1659.6	47.9	98.7
			median	257	167	68	23.75	185.5	10231.5	88.5	400228	1382	43.5	89
			s.d.*	116.468	34.5825	24.2699	4.31793	35.385	2198.04	51.8057	139451	784.316	16.3805	47.8215
		Bridge	213	265	159	-	6.9	118	5300	22.5	631669	929	55	9
				75	123	22	7.8	190	4512	19	413407	934	39	18
				349	239	37	9.5	177	4565	14.9	428536	1294	63	23
				472	197	-	3.5	151	6066	21.5	534842	1538	31	37
				195	180	593	6.7	54	6817	39	554565	2077	93	272
				83	39	536	9	120	7290	66	309793	1734	71	256
				808	186	-	9.2	178	6915	67	523481	747	142	86
				318	-	-	22.1	152	11029	67	507150	2521	132	175
				69	139	619	3.5	53	8034	35	482592	1760	83	335
				63	89	27	13.4	245	6297	75	179987	645	17	34
			mean	269.7	150.111	305.667	9.16	143.8	6682.5	42.69	456602	1417.9	72.6	124.5
			median	230	159	286.5	8.4	151.5	6557	37	494871	1416	67	61.5
			s.d.*	235.864	60.5174	304.662	5.4021	59.9144	1908.89	23.6459	131146	616.318	41.1291	123.928
		Bridge	7397	7480	210	12	3.7	173	11190	42	585264	3774	64	29
				564	172	27	6	140	8975	112	520892	1737	42	13
				269	166	38	7.7	130	7979	141	308956	890	17	11
				417	138	29	6.3	105	6111	86	304555	950	19	27
				996	111	33	9.8	146	11805	143	463711	2613	38	65
				715	187	26	5.8	179	10441	45	473866	1558	39	17
				453	119	183	16.5	139	10947	42	525154	2070	29	36
				231	254	111	12.4	129	12735	73	694867	1876	67	20
				488	208	106	11.5	141	12395	61	496683	1752	52	28
				1535	246	89	8.4	158	10557	54	497867	1904	37	29
			mean	1314.8	181.1	65.4	8.81	144	10313.5	79.9	487182	1912.4	40.4	27.5
			median	526	179.5	35.5	8.05	140.5	10752	67	497275	1814	38.5	27.5
			s.d.*	2200.6	49.5075	54.8922	3.81531	21.7511	2070.12	39.3685	116133	825.714	16.8536	15.393
		Bridge	7081	508	247	140	4.3	128	10689	136	541071	1853	76	14
				539	245	95	10.2	130	12194	204	534792	1795	57	11
				300	307	170	4.1	98	10595	301	554592	1743	48	39
				199	127	111	6.7	172	11320	264	303090	1212	48	38
				276	195	90	6.9	138	12949	284	453140	1403	53	43
				794	204	102	9	129	11490	123	425780	1482	53	21
				524	167	123	8.2	115	11504	68	501023	1721	49	27
				253	222	109	7.6	84	10608	123	529657	1988	48	20
				341	237	121	10.6	150	11341	123	461243	1164	56	30
				1037	266	97	6.9	137	12771	256	572029	2288	60	54
			mean	477.1	221.7	115.8	7.45	128.1	11546.1	188.2	487642	1664.9	54.8	29.7
			median	424.5	229.5	110	7.25	129.5	11415.5	170	515340	1732	53	28.5
			s.d.*	266.414	51.2533	24.2981	2.18034	24.9686	850.205	83.2797	80553.1	351.547	8.57386	13.7279
		Bridge	2495	1266	336	93	5.3	108	10129	100	681194	1315	47	8
				644	288	85	5.7	126	11051	43	642965	2081	85	-
				567	222	80	6.4	137	11807	67	416642	1387	33	13
				337	231	96	6.8	124	13374	61	537717	1626	66	16
				355	215	94	6	99	11089	66	522219	1282	57	22
				793	187	117	9.2	137	13388	45	465017	2169	57	40
				611	174	65	5.5	145	10301	69	426334	1595	42	15
				469	254	110	9.5	125	11897	52	565610	1893	51	-
				1144	213	100	8.9	121	12408	84	415180	1741	54	45
				342	228	91	10.9	151	11065	87	378718	952	48	21
			mean	652.8	234.8	93.1	7.42	127.3	11650.9	67.4	505160	1604.1	54	22.5
			median	589	225	93.5	6.6	125.5	11448	66.5	493618	1610.5	52.5	18.5
			s.d.*	327.436	47.7419	14.7003	2.01042	15.9656	1145.14	18.5664	102593	381.373	14.15	13.1692
		Bridge	2496	769	264	129	3.9	98	8605	74	391047	1709	37	14
				509	253	123	9.5	130	11780	64	437917	1418	45	26
				896	275	214	10.8	101	12147	39	741712	2583	69	-
				230	315	133	9.9	122	10794	86	382508	868	47	28
				264	186	82	5.4	168	7248	76	284388	710	33	19
				858	308	218	6	86	12686	52	835193	3458	75	15
				527	195	109	9	111	12406	45	566533	1878	63	21
				526	238	134	9.9	104	11886	48	551418	1723	43	10
				1405	221	84	8.1	146	11812	59	406236	1330	38	10
				985	231	134	7.9	109	10754	64	543609	1753	63	21
			mean	696.9	248.6	136	8.04	117.5	11011.8	60.7	514056	1743	51.3	18.2222
			median	648	245.5	131	8.55	110	11796	61.5	490763	1716	46	19
			s.d.*	358.078	43.2902	46.4184	2.25792	24.6768	1767.07	15.0189	170810	801.084	14.8776	6.47645
		Bridge	3705	518	163	95	12.4	218	8872	182	334144	1156	33	98
				501	118	68	9.9	214	7976	150	299008	726	19	59
				495	110	132	16.4	164	10652	101	417404	1389	35	129
				633	136	117	13.9	187	11189	128	476295	1654	36	91
				304	150	86	13.6	244	7518	132	248559	623	23	41
				1532	102	44	13	241	9873	174	372633	1403	24	54
				1612	129	95	12.6	189	10541	794	464212	2055	64	110
				186	87	58	11.3	385	6073	99	151467	473	14	40
				243	199	100	13	216	7751	191	275709	674	30	52
				274	52	48	13.8	303	8022	121	246722	960	13	48
			mean	629.8	124.6	84.3	12.99	236.1	8846.7	207.2	328615	1111.3	29.1	72.2
			median	498	123.5	90.5	13	217	8447	141	316576	1058	27	56.5
			s.d.*	516.964	41.1723	29.2918	1.71234	64.791	1658.91	208.686	104467	511.831	14.7908	31.9437
		Bridge	3707	884	101	40	14.4	192	8683	134	337514	1223	54	57
				113	-	141	15.4	262	10302	148	279130	1359	67	74
				1000	133	95	13	234	12292	154	442021	1917	60	52
				292	-	169	23.1	261	17364	197	231836	2547	35	59
				1431	152	154	14	172	9272	76	459815	1423	651	383
				446	13	116	12	249	11444	107	304155	2227	416	356
				532	141	66	14.4	177	9056	189	298324	1297	36	56
				1554	195	88	18	190	8238	217	352968	1160	36	55
				234	-	53	16	239	9019	137	197512	1657	203	363
				82	82	91	7.5	287	12363	68	227015	637	29	36
			mean	656.8	116.714	101.3	14.78	226.3	10803.3	142.7	313029	1544.7	158.7	149.1
			median	489	133	93	14.4	236.5	9787	142.5	301240	1391	57	58
			s.d.*	534.553	58.363	43.2205	4.03121	40.5135	2748.97	49.6433	87660.2	558.511	211.311	151.016
		Bridge	1600	144	70	96	22.1	231	10683	123	242238	895	77	85
				179	126	74	18.8	224	9243	167	207228	708	50	66
				256	105	90	25.1	239	11706	772	198828	1106	53	125
				285	79	59	19.7	316	10236	185	145593	460	26	48
				176	93	83	17.8	290	12993	102	249722	1060	57	47
				234	156	135	24.1	335	11956	136	229083	757	49	75
				206	57	72	22.6	351	13815	145	171640	833	33	55
				617	93	86	14.5	165	12878	176	457918	1672	40	60
				1462	306	134	23.4	223	13440	137	554121	1856	89	94
				629	106	69	18.5	303	12634	117	286436	1468	57	50
			mean	418.8	119.1	89.8	20.66	267.7	11958.4	206	274281	1081.5	53.1	70.5
			median	245	99	84.5	20.9	264.5	12295	141	235660	977.5	51.5	63
			s.d.*	406.55	71.4523	25.9135	3.3344	59.7868	1492.39	200.617	130443	450.504	18.9353	24.9499
		Bridge	3701	431	89	54	11.6	272	8016	162	235209	865	72	47
				135	113	121	11	190	7061	75	274964	815	44	36
				314	86	121	16.3	261	9569	117	274918	972	45	64
				346	92	78	14.4	292	7011	128	192731	730	32	36
				129	73	81	15.2	231	6465	141	143984	594	42	41
				725	149	49	16.6	225	8858	134	252804	1084	75	55
				190	111	89	17.8	419	7143	120	130388	486	40	45
				130	87	59	12.5	183	4265	135	141880	438	20	25
				681	249	86	7.2	143	5660	77	383484	1137	70	47
				281	193	150	10.4	164	7438	121	327365	930	57	62
			mean	336.2	124.2	88.8	13.3	238	7148.6	121	235773	805.1	49.7	45.8
			median	297.5	101.5	83.5	13.45	228	7102	124.5	244006	840	44.5	46
			s.d.*	218.577	56.729	32.8085	3.32332	79.8679	1514.43	27.0062	84173.1	240.803	18.276	12.1546
		Bridge	1599	265	119	101	15.3	246	8032	219	240999	861	107	138
				603	103	56	14.1	347	12919	139	394049	1442	149	179
				242	-	92	14	273	9196	108	276524	1433	74	133
				588	64	70	14.4	302	9955	97	312777	1466	112	194
				1242	71	49	15	299	12987	736	595969	2230	296	278
				548	147	81	13.3	216	10063	164	405041	1478	80	125
				298	113	56	12.7	244	10131	313	288243	1312	108	122
				349	-	105	27	204	13298	517	271257	3267	212	330
				607	-	956	15	181	13236	82	375287	2927	51	186
				391	-	1103	13.5	154	12921	87	333692	3423	49	186
			mean	513.3	102.833	266.9	15.43	246.6	11273.8	246.2	349384	1983.9	123.8	187.1
			median	469.5	108	86.5	14.25	245	11525	151.5	323234	1472	107.5	182.5
			s.d.*	294.048	31.1025	403.872	4.14784	59.8409	1989.99	218.671	102768	912.933	77.4823	68.5005
		Bridge	225	848	107	-	36	183	11962	161	662842	2776	98	181
				1188	264	46	17	287	12282	155	556139	2411	209	93
				2984	150	32	8.6	210	10216	199	402948	2249	173	121
				971	71	-	18	144	7768	172	662785	2204	324	163
				388	139	39	11.8	262	4944	303	166966	658	56	46
				745	207	56	15.2	272	8049	126	465512	885	131	83
				248	328	107	16.1	352	9038	134	562775	909	158	138
				299	130	46	12.6	345	6264	159	239164	643	75	44
				1624	291	139	15.9	277	15006	273	663124	2269	215	181
				1016	335	44	12.2	439	13370	154	634442	2042	203	87
			mean	1031.1	202.2	63.625	16.34	277.1	9889.9	183.6	501670	1704.6	164.2	113.7
			median	909.5	178.5	46	15.55	274.5	9627	160	559457	2123	165.5	107
			s.d.*	807.739	96.2621	38.2359	7.47517	86.8312	3242.66	58.8863	180838	826.784	79.5079	51.2706
		Bridge	319	409	173	71	10	215	9843	176	474783	1489	153	47
				397	226	57	17.8	224	11068	223	460982	1395	130	73
				625	225	65	24	211	11027	170	469306	1262	140	109
				1219	222	58	18.1	233	12349	175	643824	2418	263	74
				1051	228	43	13.2	164	8828	242	689078	2130	231	94
				1346	208	37	19.9	222	9333	189	492039	1672	173	109
				841	119	53	23	227	11306	211	468080	2027	178	118
				389	175	57	22.2	284	10440	270	336338	1318	143	65
				453	232	-	14.8	208	12082	320	604658	1746	159	74
				549	130	65	19.6	174	10845	383	469282	2219	207	101
			mean	727.9	193.8	56.2222	18.26	216.2	10712.1	235.9	510837	1767.6	177.7	86.4
			median	587	215	57	18.85	218.5	10936	217	472044	1709	166	84
			s.d.*	362.801	42.279	10.7909	4.49029	32.8153	1127.11	70.3459	104417	409.502	43.2796	23.0661
		Bridge	318	617	14	-	14.8	199	10586	456	402833	2141	157	32
				290	170	53	11.4	251	8265	426	268029	1182	130	18
				314	172	72	13.3	117	11062	32	443231	1507	16	60
				850	199	52	15.3	230	10875	630	449725	1620	157	76
				459	100	19	11	160	9503	277	621698	2075	137	99
				448	145	60	11.9	271	6180	162	302024	1141	81	60
				294	294	74	12.8	152	5306	160	409556	1018	133	-
				81	21	14	4.1	65.8	2286	61.1	56479	207	18.2	15
				558	222	60	11.3	139	8057	143	471234	1743	174	12
				1410	322	105	17.6	166	7282	173	434899	1281	168	91
			mean	532.1	165.9	56.5556	12.35	175.08	7940.2	252.01	385971	1391.5	117.12	51.4444
			median	453.5	171	60	12.35	163	8161	167.5	422228	1394	135	60
			s.d.*	373.932	102.156	27.7674	3.58182	63.2566	2796.05	192.91	150162	565.629	58.8154	33.4593
		Bridge	2498	590	185	70	4.1	187	15609	16.7	562982	2599	38	31
				877	207	118	4.6	208	15750	17.2	607554	2760	60	34
				352	226	117	8	126	11731	75	519917	1976	31	55
				346	161	78	2.1	127	8988	37	509024	1924	18	42
				756	182	68	4.6	96	10170	17	528836	2488	10	24
				3605	216	70	3	158	12953	13.8	692474	3923	39	22
				394	117	71	2.2	110	10217	35	482839	2180	20	25
				1115	234	80	4.7	148	11503	30	675689	2763	36	18
				652	202	95	4.3	159	12258	23.8	709006	2908	36	38
				579	239	105	2.3	106	10935	28	661996	2435	21	27
			mean	926.6	196.9	87.2	3.99	142.5	12011.4	29.35	595032	2595.6	30.9	31.6
			median	621	204.5	79	4.2	137.5	11617	25.9	585268	2543.5	33.5	29
			s.d.*	971.902	37.3049	19.9265	1.76538	36.3265	2238.91	17.9796	84766.1	573.458	14.2786	11.0675
		Bridge	3703	410	28	58	7.3	166	10112	44	468921	2788	26	35
				520	223	87	2.8	169	8060	25.5	463251	2164	28	20
				265	198	83	9.5	264	9345	19.3	433832	1768	26	25
				304	141	96	3.7	177	7642	18.1	397041	1333	21	35
				314	200	79	8.4	166	8432	26.8	424375	1464	32	35
				393	209	84	3.5	135	7771	31.8	440593	1791	14	37
				349	138	37	4.4	158	9887	20.3	572254	2770	27	12
				460	191	105	4.6	146	9148	16.3	515973	2220	18	18
				395	188	105	1.9	113	8673	19	483704	2322	23	26
				611	188	74	4.2	85	9179	12.4	628624	3559	36	17
			mean	402.1	170.4	80.8	5.03	157.9	8824.9	23.35	482857	2217.9	25.1	26
			median	394	189.5	83.5	4.3	162	8910.5	19.8	466086	2192	26	25.5
			s.d.*	105.456	56.8921	20.9327	2.50867	46.9904	853.583	9.16603	71406.6	681.354	6.45411	9.07989
		Bridge	3702	331	152	76	6.2	139	8609	19.5	326144	1423	15	24
				483	151	71	10.1	135	7876	29.9	390601	1476	22	32
				1158	218	57	8.4	125	9597	20.4	546104	2640	44	27
				195	86	59	12.8	184	6629	26	200091	768	12	20
				226	128	65	13.2	168	8753	30.6	294137	1230	10	24
				309	-	54	17.2	179	10040	85	331766	2378	25	48
				295	17	80	15.2	135	7914	111	253853	1605	12	52
				525	110	65	8	144	10673	25.4	363998	1875	29	37
				408	188	101	8.2	116	11542	36	571089	2001	29	32
				409	21	48	5.4	126	9792	53	293247	2215	17	49
			mean	433.9	119	67.6	10.47	145.1	9142.5	43.68	357103	1761.1	21.5	34.5
			median	369.5	128	65	9.25	137	9175	30.25	328955	1740	19.5	32
			s.d.*	275.298	68.8604	15.3493	3.94632	23.6758	1468.23	30.7671	119088	569.391	10.5751	11.5686
		Bridge	306	440	159	10	4.6	171	7721	51	442553	1370	47	21
				507	205	104	7.2	216	7394	55	647604	2801	79	44
				549	168	80	11.3	246	11507	72	537742	2388	69	61
				814	211	91	11.7	171	11823	36.6	533800	2121	47	229
				518	243	121	8.9	191	7819	60	491809	2459	64	52
				2982	216	28	6.4	152	11248	28	785587	5611	143	128
				570	252	50	8.5	208	6933	133	398778	1230	50	72
				396	-	-	32	186	11402	21.4	664362	2841	89	298
				578	127	54	20.6	250	10190	35	615982	2792	94	190
				311	137	91	6.9	274	11036	43	439373	2028	51	72
			mean	766.5	190.889	69.8889	11.81	206.5	9707.3	53.5	555759	2564.1	73.3	116.7
			median	533.5	205	80	8.7	199.5	10613	47	535771	2423.5	66.5	72
			s.d.*	789.697	45.0151	36.6723	8.37462	39.7946	1986.58	31.8539	121371	1211.05	29.9891	92.322
		Bridge	1974	397	249	51	7.4	159	7172	68	389084	1248	24	55
				881	210	25	3.6	75	9975	37	552920	2378	35	-
				460	239	34	5.2	74	11911	53	510927	2833	37	-
				186	31	19	7.5	99	8883	47	289130	1694	24	34
				345	-	-	9.6	157	10846	26.4	342301	2105	29	38
				298	18	42	12.6	213	8270	48.8	197085	1407	27	66
				299	187	54	15.7	178	7113	131	267006	915	24	55
				322	141	65	13.3	185	7311	33	190157	831	25	51
				289	246	63	8.5	130	9575	20.8	377315	953	29	29
				97	21	37	13.1	231	8124	34	155013	509	21	64
			mean	357.4	149.111	43.3333	9.65	150.1	8918	49.9	327094	1487.3	27.5	49
			median	310.5	187	42	9.05	158	8576.5	42	315716	1327.5	26	53
			s.d.*	209.884	100.129	16.1478	3.915	54.8441	1638.59	31.6718	134042	752.26	5.12619	13.8151
		Bridge	5426	469	100	17	10.7	95	12818	28.6	589008	2533	69	26
				166	-	8	12.4	161	9899	29.5	264456	1382	69	68
				735	134	22	7.5	121	10574	40	366502	1857	50	63
				179	185	66	5.3	122	9297	31.3	306716	982	35	35
				197	257	58	6.9	105	8738	41	387177	1083	38	53
				379	152	37	6.4	96	8836	36.7	333439	1339	47	63
				574	214	67	5.3	68	13016	22.4	755801	2829	57	18
				492	-	-	10.5	160	8760	87	324389	1377	50	67
				878	265	64	4.4	160	10778	20.6	450015	1775	45	39
				294	188	39	7.2	96	11149	34	444096	1458	45	34
			mean	436.3	186.875	42	7.66	118.4	10386.5	37.11	422160	1661.5	50.5	46.6
			median	424	186.5	39	7.05	113	10236.5	32.65	376840	1420	48.5	46
			s.d.*	242.101	57.7196	22.7925	2.6655	32.6027	1591.23	18.7835	149206	603.189	11.5302	18.3981
		Bridge	1025	703	256	31	5.2	73	14757	4.8	731597	2386	51	-
				194	130	28	7.5	108	8646	12.3	306325	1173	26	13
				982	288	116	5.1	89	11030	4.8	662304	4189	59	-
				71	92	30	3.5	118	5788	8.5	130880	509	-	16
				1654	276	41	2.9	121	10410	4.3	567089	2357	36	19
				254	166	38	6.6	101	7528	10.7	328111	1037	16	7
				240	177	26	5.7	88	6809	11.6	311301	1008	17	20
				238	366	37	3.6	71	5561	24.1	436432	915	27	49
				378	276	43	4.6	88	10620	12.5	464942	1917	29	-
				265	326	30	4.6	104	11649	6.7	505250	1648	32	-
			mean	497.9	235.3	42	4.93	96.1	9279.8	10.03	444423	1713.9	32.5556	20.6667
			median	259.5	266	34	4.85	95	9528	9.6	450687	1410.5	29	17.5
			s.d.*	488.734	89.2264	26.625	1.42365	17.2334	2931.57	5.89822	181904	1073.73	14.3798	14.6515
		Bridge	2695	954	144	68	10.6	206	12692	24.6	438134	2412	39	64
				1477	176	53	2.7	179	11222	15.3	467582	1812	37	31
				1390	204	81	9.8	180	14677	36.2	555963	3172	34	62
				1010	227	68	6.5	164	14079	23.6	518217	2547	46	55
				1212	212	97	5.3	145	13084	24.2	555271	2954	48	31
				389	279	126	7.3	63	7135	18	903244	2029	77	33
				308	248	29	12.7	84	7539	23	697213	1543	46	23
				259	284	-	10.4	81	8326	21.7	583259	1725	35	6
				167	148	39	8.1	110	8731	12.8	293530	1098	20	22
				299	183	-	2.9	30.5	5660	15.2	641988	1121	36	-
			mean	746.5	210.5	70.125	7.63	124.25	10314.5	21.46	565440	2041.3	41.8	36.3333
			median	671.5	208	68	7.7	127.5	9976.5	22.35	555617	1920.5	38	31
			s.d.*	513.238	49.5452	31.4526	3.34367	58.7212	3219.52	6.71436	163229	718.215	14.7558	19.8242
		Bridge	466	134	134	67	12	180	8186	272	207892	587	155	60
				122	144	55	15.6	204	7961	201	229738	353	187	55
				329	140	52	10.5	141	6988	184	378494	912	217	53
				362	178	90	12.9	139	6543	152	271828	875	148	66
				133	72	53	16.1	252	7333	238	149055	469	114	43
				939	234	103	11.6	78	8879	64	499547	1250	187	56
				838	220	74	12.8	95	6428	98	512754	1395	236	94
				402	256	43	14.8	95	6867	119	404720	660	117	83
				444	172	52	6.1	205	6852	46	325273	981	32	43
				108	161	59	9.2	147	4652	88	251388	506	100	21
			mean	381.1	171.1	64.8	12.16	153.6	7068.9	146.2	323069	798.8	149.3	57.4
			median	345.5	166.5	57	12.4	144	6927.5	135.5	298550	767.5	151.5	55.5
			s.d.*	296.613	54.37	19.0193	3.05258	56.3327	1155.33	75.9865	123329	344.515	60.97	20.6624
		Angkor Thom	Outer Enclosure	828	148	66	58	89	5914	184	410782	1234	365	91
				357	134	76	13.7	94	5482	143	325875	772	278	62
				421	148	68	23.7	95	6517	222	379380	939	191	118
				-	78	23	8	63	2740	213	131632	201	108	16
				27	63	36	14.8	221	3820	128	55926	163	61	40
				96	50	15	12	108	3363	155	154776	498	181	35
				274	146	65	19	168	6010	218	270179	627	326	69
				529	178	56	20.8	146	8430	303	381069	1862	393	53
				151	136	31	10.2	124	4616	199	217832	418	403	41
				319	158	44	16.8	124	6152	370	274954	604	471	36
			mean	333.556	123.9	48	19.7	123.2	5304.4	213.5	260240	731.8	277.7	56.1
			median	274	136	44	16.8	124	5304.4	213.5	260240	604	326	41
			s.d.*	244.531	43.7987	21.145	14.2962	45.6625	1695.8	74.0709	118924	512.059	137.007	30.1936
		Prasat Suor Prat	S2&S3 Towers	79	21	20	9.6	30.1	3564	46.5	42440	195	40	10
				107	93	56	17.2	85	6145	130	193932	373	73	52
				567	127	84	23.5	138	8534	212	278365	1483	261	42
				427	128	67	78	125	5524	401	199420	836	236	38
				130	29	28	16	67	3996	60.9	63960	277	70	26
				342	129	67	11.4	111	8180	133	338143	767	264	23
				374	111	60	12.3	72	5379	89	284975	690	175	29
				1475	200	103	16.9	139	8063	131	471416	1528	246	57
				469	122	87	52	148	8384	188	356152	1247	180	26
				547	309	100	16.1	109	7373	150	597064	1335	368	16
			mean	451.7	126.9	67.2	25.3	102.41	6514.2	154.14	282587	873.1	191.3	31.9
			median	400.5	124.5	67	16.5	110	6759	132	281670	801.5	208	27.5
			s.d.*	401.347	82.1482	27.836	22.1345	38.0379	1854.05	100.852	171049	501.713	104.536	15.1397
		Banteay Samre	Outer Enclosure	354	76	53	25.3	137	6730	424	260946	851	161	34
				1541	158	115	85	161	8244	915	344828	3076	466	73
				157	101	37	9.4	95	5101	437	159718	356	180	55
				284	137	51	17.7	160	6730	231	284844	684	207	12
				2214	169	101	84	139	8697	182	432152	4644	484	90
				1235	199	95	14.6	111	7215	455	413815	1625	440	100
				528	90	33	19.8	134	8705	152	210469	778	233	16
				190	150	43	9.4	129	7399	230	332038	835	370	52
				416	183	55	17.5	93	6511	209	385897	1244	249	15
				527	130	44	19.6	102	5814	182	460691	1236	411	59
			mean	744.6	139.3	62.7	30.23	126.1	7114.6	341.7	328540	1532.9	320.1	50.6
			median	471.5	143.5	52	18.65	131.5	6972.5	230.5	338433	1043.5	309.5	53.5
			s.d.*	687.483	40.5738	29.4696	28.9984	24.933	1192.86	232.546	98859.3	1327.82	126.339	31.2986
		Banteay Samre	Inner Enclosure	165	164	76	22.7	98	4625	242	302690	455	347	85
				368	116	70	16.7	104	4992	200	249198	730	289	84
				1387	191	105	13.5	110	8807	152	434159	1714	431	148
				-	-	14	29.9	121.7	2269	135	9799	207	12.7	9
				123	126	65	13.3	94	4809	212	281923	669	261	115
				9	5.6	28	24.3	93	2792	316	13375	52	33.2	15
				66	140	88	17.8	130	2936	161	93722	132	178	30
				239	138	66	12.3	129	6750	164	403480	1069	871	185
				41	91	77	27.8	111	2994	265	51708	113	133	39
				329	172	137	14.4	129	6717	222	356750	954	343	105
			mean	303	127.067	72.6	19.27	111.97	4769.1	206.9	219680	609.5	289.89	81.5
			median	165	138	73	17.25	110.5	4717	206	265560	562	275	84.5
			s.d.*	425.257	54.6991	34.9546	6.43619	14.7048	2128.27	56.7087	163605	531.142	245.94	58.6558
		Chau Say Tevoda	Outer Enclosure	353	191	107	13.1	167	4393	140	278840	669	168	84
				320	167	71	9.9	104	5872	235	414575	863	199	77
				147	106	85	13.7	188	6995	116	194784	517	118	46
				704	177	105	10.8	114	7248	147	443007	1199	172	49
				388	142	53	11.5	131	6920	159	309431	677	120	27
				612	160	39	12.5	135	6660	109	339976	838	183	49
				396	158	81	10.8	126	6202	86	373996	1041	232	47
				945	185	121	14.2	103	8475	73	479149	1405	196	66
				539	173	110	8	83	4936	360	416775	1143	201	83
				133	169	93	8.2	77	4613	98	392106	539	112	76
			mean	453.7	162.8	86.5	11.27	122.8	6231.4	152.3	364264	889.1	170.1	60.4
			median	392	168	89	11.15	120	6431	128	383051	850.5	177.5	57.5
			s.d.*	251.426	24.3575	26.2435	2.15615	34.8578	1295.94	86.2993	85097.9	299.533	40.9158	19.3804
		Ta Prohm	Inner Enclosure	375	145	66	21.4	146	5507	158	286543	823	231	30
				89	96	58	12.5	69	3950	103	201427	508	248	43
				748	138	56	19.1	132	6406	221	327739	1568	299	65
				205	239	104	15.9	150	5695	178	272099	595	262	28
				516	249	78	18.8	130	7178	260	521856	1083	543	62
				308	162	69	31.2	157	5700	188	269726	863	509	42
				387	188	44	25.1	104	5959	301	425529	1050	458	41
				506	132	46	18.9	108	4796	191	308885	721	385	26
				184	117	77	12	125	5578	324	227213	864	131	19
				611	165	66	21.4	76	5255	167	393333	1151	375	57
			mean	392.9	163.1	66.4	19.63	119.7	5602.4	209.1	323435	922.6	344.1	41.3
			median	381	153.5	66	19	127.5	5636.5	189.5	297714	863.5	337	41.5
			s.d.*	205.608	49.7961	17.5259	5.72054	30.0926	868.245	68.1183	97716	306.853	132.735	15.9028
		Banteay Kdei	Inner Enclosure	88	133	66	28.3	152	5874	161	224912	602	176	28
				275	190	59	23.4	105	6025	152	354399	999	231	38
				88	149	64	39.9	87	5886	198	148055	629	59	44
				830	166	76	46	297	15068	84	440218	2445	78	46
				393	221	79	65	105	8106	188	223509	1938	53	61
				738	94	56	218	129	4216	184	98638	1421	176	48
				600	219	63	18.8	181	9615	20.7	318847	1525	44	31
				749	146	93	171	152	6518	170	242804	1343	238	52
				545	178	79	87	174	8726	325	298627	2170	214	86
				434	223	105	68	111	7539	242	176294	1365	242	61
			mean	474	171.9	74	76.54	149.3	7757.3	172.47	252630	1443.7	151.1	49.5
			median	489.5	172	71	55.5	140.5	7028.5	177	233858	1393	176	47
			s.d.*	266.402	42.7095	15.6702	66.6743	60.6723	3020.87	82.0186	102326	611.724	83.2098	16.946
		Thommanon	Enclosure	490	175	72	17.6	169	7418	158	387985	1112	198	13
				296	144	76	17.5	149	7496	160	343204	1052	195	29
				997	202	46	22.9	105	9841	161	486286	2732	244	43
				49	109	71	17.4	137	5685	151	229150	393	104	24
				341	297	96	20.9	79	5492	120	569521	969	292	10
				337	147	81	19.1	137	8256	223	331113	1515	216	22
				394	206	60	17.3	104	7327	153	372525	1143	217	30
				1457	231	54	21	112	9932	247	525341	1261	268	56
				389	234	84	18.1	93	7267	137	473577	955	201	26
				184	195	60	20.1	120	6630	123	405839	980	236	70
			mean	493.4	194	70	19.19	120.5	7534.4	163.3	412454	1211.2	217.1	32.3
			median	365	198.5	71.5	18.6	116	7372.5	155.5	396912	1082	216.5	27.5
			s.d.*	419.365	53.8331	15.1511	1.9479	27.4317	1495.5	40.9092	102116	605.039	50.7575	18.8506
		Chau Say Tevoda	Foundation	1394	229	80	15.8	129	8264	324	450044	1229	355	115
				978	218	89	17.3	129	7395	281	476899	1241	411	131
				222	266	86	16.3	97	5802	158	477948	676	193	41
				1491	183	74	13.2	134	8024	116	437493	1117	203	58
				265	170	90	14.8	196	6480	152	293724	486	176	59
				538	277	146	16.9	118	7454	135	417449	897	206	89
				147	76	46	16.9	212	5002	150	158695	421	159	45
				221	27	47	7.4	72.9	3535	100	88613	622	73	17
				448	246	105	14.9	105	6341	275	559223	696	254	171
				97	89	63	12.8	312	4265	55.8	155236	622	20	88
			mean	580.1	178.1	82.6	14.63	150.49	6256.2	174.68	351532	800.7	205	81.4
			median	356.5	200.5	83	15.35	129	6410.5	151	427471	686	198	73.5
			s.d.*	521.446	86.657	29.2506	2.96949	70.8222	1601.89	88.0616	164809	301.885	116.472	46.9898
		Angkor Wat	Outer Enclosure	78	65	58	41.9	153	3065	177	48731	398	46	60
				664	144	88	210	123	5777	180	251760	1564	190	112
				256	218	90	62	117	5127	152	169357	958	162	40
				95	70	62	59	173	3680	161	53517	429	52	57
				369	225	102	62	112	4760	158	219093	971	185	48
				21	7.2	20	15.3	114	2635	567	12950	405	134	17
				227	146	68	90	167	3698	169	121551	563	130	44
い				182	148	83	32.8	114	2653	343	113362	525	153	75
				204	108	65	54	149	2914	216	72192	805	101	57
				248	97	83	51	125	3628	289	95931	1176	183	75
				167	146	82	61	141	4636	211	115312	772	94	70
				108	12.6	19	32	114	4804	480	23378	763	42	29
				638	359	111	61	110	8495	264	395530	2290	245	37
				154	201	60	41.4	104	4235	128	137270	705	100	54
				383	285	116	51	106	6414	213	269509	1871	206	87
				746	269	88	59	106	6655	211	353898	1528	205	80
				255	153	52	40	124	5558	185	206278	942	120	52
				324	124	65	24.1	164	5661	148	207479	521	137	60
				168	260	89	38	93	2923	111	163585	509	123	60
				107	144	82	55	120	2543	152	82865	420	88	52
				56	65	43	28.1	161	2878	148	33094	278	53	45
				193	209	79	36	115	4621	130	155536	845	137	77
				168	278	111	45	101	3799	142	202016	601	183	66
				213	310	105	48	110	4544	181	217124	872	250	85
				171	138	52	51	141	3521	437	60040	650	111	73
			mean	247.8	167.272	74.92	53.944	126.28	4368.96	222.12	151254	854.44	137.2	60.48
			median	193	146	82	51	117	4235	180	137270	763	134	60
			s.d.*	186.771	92.3432	25.8826	36.0151	22.9629	1479.48	116.781	99717.4	494.531	59.0776	20.4555
		*standard deviation
